# Supplementary material
Source: ML conference proceedings conference paper supplement (https://openreview.net/forum?id=ayjmOqf79t)
Supplement: supplementary_material [file NeurIPS 2025 Supp.pdf › NeurIPS 2025 Supp.pdf]

519 **A Photoreceptor parameters**

Table S1: Comparison of fitted photoreceptor parameters to previous estimates

| Parameter         | Description                                     | Chen et al. 2024 | Ours  | Our bounds     |
|-------------------|-------------------------------------------------|------------------|-------|----------------|
| $\sigma$          | Opsin decay rate                                | 9.74             | 14.2  | (5, 24)        |
| $\phi$            | PDE decay rate                                  | 9.74             | 12.4  | (5, 24)        |
| $\eta$            | PDE dark activation                             | 761              | 774   | (750, 800)     |
| $G_{\text{dark}}$ | Dark cGMP concentration                         | 15.9-20          | 23.5  | (12, 25)       |
| $k$               | cGMP-to-current factor                          | 0.01             | 0.015 | (0.008, 0.022) |
| $n$               | cGMP channel cooperativity                      | 3                | 2.88  | (2.8, 3.2)     |
| $C_{\text{dark}}$ | Dark $\text{Ca}^{2+}$ concentration             | 1                | 1.03  | (0.8, 1.2)     |
| $\beta$           | $\text{Ca}^{2+}$ extrusion rate                 | 2.64             | 4.42  | (2.5, 10)      |
| $m$               | Cooperativity of GC $\text{Ca}^{2+}$ dependence | 4                | 4.10  | (3.75, 4.25)   |
| $K_{\text{CG}}$   | Affinity of GC $\text{Ca}^{2+}$ dependence      | 0.4              | 0.348 | (0.2, 0.6)     |
| $\gamma$          | Opsin gain                                      | 10               | 10.6  | (1, 22)        |
